# Supplementary material
Source: publisher figshare collection journal article supplement (https://diabetesjournals.figshare.com/articles/dataset/_/13166159)
Supplement: Supplementary file 1 [file 2]

**ONLINE ONLY SUPPLEMENT (APPENDIX)**

**Appendix Table 1. Comparison of Look AHEAD, ACCORD, and ACCORDION Definitions of Complications**

| <b>Outcome</b> | <b>Component</b>                                                            | <b>Look AHEAD</b>                                                    | <b>LAC<br/>(Differences<br/>from LA)</b> | <b>ACCORD</b>               | <b>ACCORDION<br/>(Differences from<br/>ACCORD)</b> | <b>Note</b>                                                                                                                      |
|----------------|-----------------------------------------------------------------------------|----------------------------------------------------------------------|------------------------------------------|-----------------------------|----------------------------------------------------|----------------------------------------------------------------------------------------------------------------------------------|
| <b>MI</b>      |                                                                             | Adjudicated through LAC for first event; collected when event occurs |                                          | Collected when event occurs |                                                    | Collected in ACCORDION without adjudications; only 10% were adjudicated for quality-control purpose, but data are not available. |
|                | Q-wave myocardial infarction                                                | X                                                                    |                                          | X                           |                                                    |                                                                                                                                  |
|                | Aborted myocardial infarction                                               | X                                                                    |                                          | -                           |                                                    |                                                                                                                                  |
|                | Non Q-wave myocardial infarction                                            | X                                                                    |                                          | X                           |                                                    |                                                                                                                                  |
|                | Silent (unrecognized) myocardial infarction                                 | X                                                                    |                                          | X                           |                                                    |                                                                                                                                  |
|                | Probable non Q-wave myocardial infarction                                   | X                                                                    |                                          | X                           |                                                    |                                                                                                                                  |
|                | Non-fatal myocardial infarction after cardiovascular invasive interventions | X                                                                    |                                          | X                           |                                                    | Combined definitions in ACCORD protocol 5.1.b.5 and 5.1.b.6                                                                      |
|                | Non-fatal myocardial infarction after non-                                  | X                                                                    |                                          | X                           |                                                    |                                                                                                                                  |

| Outcome       | Component                                                    | Look AHEAD                                                           | LAC<br>(Differences from LA) | ACCORD                      | ACCORDION<br>(Differences from<br>ACCORD) | Note                                          |
|---------------|--------------------------------------------------------------|----------------------------------------------------------------------|------------------------------|-----------------------------|-------------------------------------------|-----------------------------------------------|
|               | cardiovascular surgery                                       |                                                                      |                              |                             |                                           |                                               |
| <b>Stroke</b> |                                                              | Adjudicated through LAC for first event; collected when event occurs |                              | Collected when event occurs |                                           | Collected in ACCORDION without adjudications  |
|               | Definite ischemic stroke                                     | X                                                                    |                              | X                           |                                           |                                               |
|               | Probable ischemic stroke                                     | X                                                                    |                              | -                           |                                           |                                               |
|               | Definite primary intracerebral hemorrhage                    | X                                                                    |                              | X                           |                                           |                                               |
|               | Probable intracerebral hemorrhage                            | X                                                                    |                              | -                           |                                           |                                               |
|               | Definite subarachnoid hemorrhage                             | X                                                                    |                              | X                           |                                           |                                               |
|               | Probable subarachnoid hemorrhage                             | X                                                                    |                              | -                           |                                           | ACCORD just indicates subarachnoid hemorrhage |
|               | Stroke of unknown type etiology                              | X                                                                    |                              | X                           |                                           |                                               |
|               | Non-fatal stroke after cardiovascular invasive interventions | X                                                                    |                              | X                           |                                           |                                               |

| Outcome                               | Component                                        | Look AHEAD                                                           | LAC<br>(Differences from LA) | ACCORD                                              | ACCORDION<br>(Differences from<br>ACCORD)    | Note                                                  |
|---------------------------------------|--------------------------------------------------|----------------------------------------------------------------------|------------------------------|-----------------------------------------------------|----------------------------------------------|-------------------------------------------------------|
|                                       | Non-fatal stroke post non-cardiovascular surgery | X                                                                    |                              | X                                                   |                                              |                                                       |
| <b>Angina</b>                         |                                                  | Adjudicated through LAC for first event; collected when event occurs |                              | Not adjudicated; collected when event occurs        |                                              |                                                       |
|                                       | Hospitalized angina                              | X                                                                    |                              |                                                     |                                              | Collected every 6 months through hospitalization CRF. |
|                                       | Unstable angina                                  |                                                                      |                              | X annually through hospitalization CRF (ANHX form). | X every 6 months through hospitalization CRF |                                                       |
| <b>Congestive heart failure (CHF)</b> |                                                  | Adjudicated through LAC for first event                              |                              | Not adjudicated                                     |                                              |                                                       |
|                                       | Fatal                                            | X                                                                    |                              | X                                                   | X                                            |                                                       |
|                                       | Non-fatal                                        | X every 6 months through hospitalization CRF                         |                              | X annually through hospitalization CRF (ANHX form). | X every 6 months through hospitalization CRF |                                                       |
| <b>Coronary heart disease (CHD)</b>   |                                                  |                                                                      |                              |                                                     |                                              |                                                       |

| Outcome                                     | Component                                              | Look AHEAD                                                        | LAC<br>(Differences from LA) | ACCORD                                    | ACCORDION<br>(Differences from ACCORD) | Note |
|---------------------------------------------|--------------------------------------------------------|-------------------------------------------------------------------|------------------------------|-------------------------------------------|----------------------------------------|------|
|                                             | Nonfatal MI                                            | X                                                                 |                              | X                                         |                                        |      |
|                                             | Angina                                                 | X                                                                 |                              | X (unstable)                              |                                        |      |
|                                             | Cardiovascular death other than stroke death           | X                                                                 |                              | X                                         |                                        |      |
| <b>Revascularization (hospitalizations)</b> |                                                        | Adjudicated through LAC for first event; collected every 6 months |                              | Not adjudicated; collected every 4 months |                                        |      |
|                                             | PTCA (balloon)                                         | X                                                                 |                              | X                                         |                                        |      |
|                                             | PTCA (with stent)                                      |                                                                   |                              | X                                         |                                        |      |
|                                             | CABG surgery                                           | X                                                                 |                              | X                                         |                                        |      |
|                                             | Carotid angioplasty with stent                         | X                                                                 |                              | X                                         |                                        |      |
|                                             | Carotid endarterectomy                                 |                                                                   |                              | X                                         |                                        |      |
|                                             | Peripheral angioplasty, with or without stent          |                                                                   |                              | X                                         |                                        |      |
|                                             | Peripheral vascular surgery, including aortic aneurysm |                                                                   |                              | X                                         |                                        |      |

| Outcome                 | Component                                                                                           | Look AHEAD                                                 | LAC<br>(Differences from LA) | ACCORD                                                                                                                         | ACCORDION<br>(Differences from ACCORD)   | Note                                                        |
|-------------------------|-----------------------------------------------------------------------------------------------------|------------------------------------------------------------|------------------------------|--------------------------------------------------------------------------------------------------------------------------------|------------------------------------------|-------------------------------------------------------------|
|                         | Repair                                                                                              |                                                            |                              |                                                                                                                                |                                          |                                                             |
|                         | Aortic aneurysm                                                                                     | X                                                          |                              |                                                                                                                                |                                          |                                                             |
|                         | Poor blood circulation or blocked or narrowed artery or arteries to the legs or feet (claudication, | X                                                          |                              |                                                                                                                                |                                          |                                                             |
|                         | peripheral arterial disease, gangrene, or Buerger's disease)                                        |                                                            |                              |                                                                                                                                |                                          |                                                             |
| <b>Microalbuminuria</b> | ACR – X ( $\geq 30$ mg/g)                                                                           | Annually through year 4, every 2 years                     | Once                         | baseline, M24, M48, and EXIT                                                                                                   | Twice (1st and 3rd of the clinic visits) |                                                             |
| <b>Macroalbuminuria</b> | ACR – X ( $\geq 300$ mg/g)                                                                          | Annually through year 4, every 2 years                     | Once                         | baseline, M24, M48, and EXIT                                                                                                   | Twice                                    |                                                             |
| <b>eGFR</b>             |                                                                                                     | X CKD-EPI equation; annually through year 4, every 2 years | Once                         | X MDRD equation; every 4 months in the Lipid Trial; every 4 months for the first year then annually thereafter in the BP trial | Twice                                    | Wake Forest recalculated ACCORD eGFR using CKD-EPI equation |
| <b>Decreased eGFR</b>   |                                                                                                     | <60                                                        |                              |                                                                                                                                |                                          |                                                             |

| Outcome                 | Component                      | Look AHEAD                                                                                                                          | LAC<br>(Differences from LA) | ACCORD                                                                                                                                           | ACCORDION<br>(Differences from<br>ACCORD)        | Note |
|-------------------------|--------------------------------|-------------------------------------------------------------------------------------------------------------------------------------|------------------------------|--------------------------------------------------------------------------------------------------------------------------------------------------|--------------------------------------------------|------|
| Severely decreased eGFR |                                | <30                                                                                                                                 |                              |                                                                                                                                                  |                                                  |      |
| Amputation              | Hospitalization                | X Amputation of a part of a leg, including toes, because of poor blood circulation, gangrene, or diabetes; collected every 6 months |                              | Lower extremity for ischemia. (Interval and annual follow-up Misc CVD Outcomes Form triggered by hospitalization form); collected every 4 months | Every 6 months                                   |      |
| Foot ulcer              |                                |                                                                                                                                     |                              |                                                                                                                                                  |                                                  |      |
|                         | Hospitalization form           | -                                                                                                                                   | X Foot/leg ulcer             | -                                                                                                                                                |                                                  |      |
|                         | Outpatient procedures          | -                                                                                                                                   | X Foot ulcer                 | -                                                                                                                                                |                                                  |      |
|                         | MNSI                           | X Open sore on foot; collected annually                                                                                             |                              | -                                                                                                                                                |                                                  |      |
|                         | Foot exam                      | -                                                                                                                                   | Once                         | X no exam if yes to amputation/foot inspection. Collected annually                                                                               | Three clinic visits                              |      |
| Retinopathy             | Retinal laser photocoagulation | X Every 6 month                                                                                                                     |                              | X annually                                                                                                                                       | 1 <sup>st</sup> and 3 <sup>rd</sup> clinic visit |      |

| Outcome              | Component                                                                                                                                                                                                                                          | Look AHEAD                           | LAC<br>(Differences from LA) | ACCORD                                                                                               | ACCORDION<br>(Differences from ACCORD)                         | Note |
|----------------------|----------------------------------------------------------------------------------------------------------------------------------------------------------------------------------------------------------------------------------------------------|--------------------------------------|------------------------------|------------------------------------------------------------------------------------------------------|----------------------------------------------------------------|------|
| <b>Visual acuity</b> | Severe vision loss (as measured by Snellen fraction < 20/200)                                                                                                                                                                                      | -                                    |                              | X annually<br>(Physical exam form)                                                                   | 3rd clinic visit                                               |      |
| <b>Neuropathy</b>    | MNSI score > 2.0 ( $\geq$ 2.5)                                                                                                                                                                                                                     | -                                    | Once                         | X annually                                                                                           | 3 clinic visits                                                |      |
| <b>Hypoglycemia</b>  | Symptomatic, severe hypoglycemia was defined as either a blood glucose concentration of less than 2.8 mmol/l (50 mg/dl) or symptoms that promptly resolved with oral carbohydrate, intravenous glucose, or subcutaneous or intramuscular glucagon. |                                      |                              | X (separate questions: require any assistance, require medical assistance); collected every 4 months | X (require medical assistance); every contact (7 times in all) |      |
|                      | Loss of consciousness, seizure, or a glucose < 70 mg/dL that prevented self-treatment, and required assistance of another person                                                                                                                   | X (primary outcome in LA paper); SAE | No longer collected in LAC   |                                                                                                      |                                                                |      |

\*Note: Analyses in ACCORDION were conducted on all of the cardiovascular outcomes that occurred after randomization and that were reported by the sites during the active or follow-up period, regardless of the final adjudication status.

Below are the results from the fixed effects (FE), ordinary-least-squares (OLS), and random-effects (RE) models. For both diagnostic tests (Breusch-Pagan Lagrange multiplier test and the Hausman test), the null hypothesis was rejected, indicating that an FE model is preferred over the OLS or RE models. See Appendix Table 2 for test statistics from the diagnostic tests. Results from the OLS model were adjusted for clustering by patient ID.

**Appendix Table 2. Health Utility Decrements for Complications of Diabetes: FE, OLS and RE Comparison**

| Covariate                                       | FE<br>Coefficient | OLS<br>Coefficient | RE<br>Coefficient |
|-------------------------------------------------|-------------------|--------------------|-------------------|
| <b>Complication Coefficients</b>                |                   |                    |                   |
| Smoker                                          | −0.006            | −0.059*            | −0.003*           |
| BMI (one-unit increase)                         | −0.003*           | −0.006*            | −0.004*           |
| Duration of Diabetes (time-varying)             | −0.008*           | −0.005*            | −0.007*           |
| Stroke Event                                    | −0.109*           | −0.154*            | −0.122*           |
| History of Stroke                               | −0.051*           | −0.091*            | −0.081*           |
| Amputation Event                                | −0.092*           | −0.164*            | −0.098*           |
| History of Amputation                           | −0.150*           | −0.067*            | −0.097*           |
| Dialysis Event                                  | −0.039*           | −0.065*            | −0.045*           |
| History of Dialysis                             | −0.015            | −0.054*            | −0.024*           |
| MI Event                                        | −0.028*           | −0.039*            | −0.033*           |
| History of MI                                   | −0.006            | −0.022*            | −0.017*           |
| CHF Event                                       | −0.051*           | −0.070*            | −0.055*           |
| History of CHF                                  | −0.041*           | −0.058*            | −0.054*           |
| Angina Event                                    | −0.015            | −0.042*            | −0.023*           |
| History of Angina                               | −0.028*           | −0.044*            | −0.036*           |
| eGFR < 30 mL/min/1.73 m <sup>2</sup> Event      | −0.043*           | −0.063*            | −0.048*           |
| History of eGFR < 30 mL/min/1.73 m <sup>2</sup> | −0.025*           | −0.036*            | −0.030*           |
| eGFR < 60 mL/min/1.73 m <sup>2</sup> Event      | −0.014*           | −0.021*            | −0.015*           |
| History of eGFR < 60 mL/min/1.73 m <sup>2</sup> | −0.015*           | −0.017*            | −0.016*           |
| Revascularization Event                         | −0.005            | −0.011             | −0.008            |



| Covariate                                                                     | FE<br>Coefficient                       | OLS<br>Coefficient | RE<br>Coefficient |
|-------------------------------------------------------------------------------|-----------------------------------------|--------------------|-------------------|
| History of Revascularization                                                  | 0.001                                   | −0.012*            | −0.008*           |
| Laser Photocoagulation Event                                                  | −0.011                                  | −0.021*            | −0.013*           |
| History of Laser Photocoagulation                                             | −0.014*                                 | −0.023*            | −0.016*           |
| Hypoglycemia (any assistance)                                                 | 0.001                                   | −0.041*            | −0.005            |
| <b>Additional Control Variables</b>                                           |                                         |                    |                   |
| Age at Diagnosis                                                              | n/a                                     | −0.002*            | −0.003*           |
| Female                                                                        | n/a                                     | −0.039*            | −0.041*           |
| Hispanic                                                                      | n/a                                     | −0.039*            | −0.039*           |
| Other Race                                                                    | n/a                                     | −0.034*            | −0.016*           |
| White Race                                                                    | n/a                                     | −0.034*            | −0.031*           |
| College Education                                                             | n/a                                     | 0.038*             | 0.049*            |
| ACCORD Study Participant                                                      | n/a                                     | −0.033*            | −0.031*           |
| Constant                                                                      | 0.935*                                  | 1.153*             | 1.155*            |
| <b>Estimation Sample</b>                                                      |                                         |                    |                   |
| N (total person-visit observations) <sup>†</sup>                              | 128,873                                 | 127,096            | 127,096           |
| N (total unique persons) <sup>†</sup>                                         | 15,252                                  | 15,129             | 15,129            |
| RMSE                                                                          | n/a                                     | 0.253              | n/a               |
| <b>Diagnostic Test Results</b>                                                |                                         |                    |                   |
| Breusch and Pagan Lagrange<br>Multiplier Test Statistic for<br>random effects | 130,000, $p < 0.001$ , null is rejected |                    |                   |
| Hausman Test Statistic                                                        | 438, $p < 0.001$ , null is rejected     |                    |                   |

Note: Results from the OLS model were adjusted for clustering by patient ID.

\*Covariates that are statistically significant at the 5% level

<sup>†</sup>The OLS and RE estimates are based on slightly fewer individuals and observations because of missing time-invariant variables for race/ethnicity and education.

Appendix Table 3 shows the fixed effects regression results for the combined sample as well as the ACCORD sample alone and the Look AHEAD sample alone. Some results differ by

sample, but most are similar. By pooling both trials in the combined sample, we have a larger number of events and a broader range of diabetes patients with which to estimate utility effects.

Therefore, the combined sample was presented as our main analysis.

**Appendix Table 3. Health Utility Decrements for Complications of Diabetes: Comparing FE results for the combined sample, ACCORD only sample, and Look AHEAD only sample.**

| Covariate                                       | Combined Sample | ACCORD Only | Look AHEAD Only |
|-------------------------------------------------|-----------------|-------------|-----------------|
| <b>Complication Coefficients</b>                |                 |             |                 |
| Smoker                                          | -0.006          | -0.010      | 0.005           |
| BMI (one-unit increase)                         | -0.003*         | -0.002*     | -0.004*         |
| Duration of Diabetes (time-varying)             | -0.008*         | -0.007*     | -0.008*         |
| Stroke Event                                    | -0.109*         | -0.108*     | -0.109*         |
| History of Stroke                               | -0.051*         | -0.060*     | -0.044          |
| Amputation Event                                | -0.092*         | -0.090*     | -0.100          |
| History of Amputation                           | -0.150*         | -0.147*     | -0.163*         |
| Dialysis Event                                  | -0.039*         | -0.016      | -0.105*         |
| History of Dialysis                             | -0.015          | -0.012      | -0.034          |
| MI Event                                        | -0.028*         | -0.018      | -0.038*         |
| History of MI                                   | -0.006          | 0.004       | -0.018          |
| CHF Event                                       | -0.051*         | -0.047*     | -0.050*         |
| History of CHF                                  | -0.041*         | -0.026      | -0.045*         |
| Angina Event                                    | -0.015          | 0.003       | -0.026*         |
| History of Angina                               | -0.028*         | -0.009      | -0.042*         |
| eGFR < 30 mL/min/1.73 m <sup>2</sup> Event      | -0.043*         | -0.066*     | 0.012           |
| History of eGFR < 30 mL/min/1.73 m <sup>2</sup> | -0.025*         | -0.052*     | 0.027           |
| eGFR < 60 mL/min/1.73 m <sup>2</sup> Event      | -0.014*         | -0.012*     | -0.019*         |
| History of eGFR < 60 mL/min/1.73 m <sup>2</sup> | -0.015*         | -0.016*     | -0.018*         |
| Revascularization Event                         | -0.005          | -0.011      | 0.003           |

| <b>Covariate</b>                    | <b>Combined Sample</b> | <b>ACCORD Only</b> | <b>Look AHEAD Only</b> |
|-------------------------------------|------------------------|--------------------|------------------------|
| History of Revascularization        | -0.001                 | -0.019*            | 0.020                  |
| Laser Photocoagulation Event        | -0.011                 | -0.013             | -0.008                 |
| History of Laser Photocoagulation   | -0.014*                | -0.010             | -0.015                 |
| Hypoglycemia (any assistance)       | -0.001                 | 0.001              | -0.006                 |
| Constant                            | 0.935*                 | 0.870*             | 0.970*                 |
| <b>Estimation Sample</b>            |                        |                    |                        |
| N (total person-visit observations) | 128,873                | 53,746             | 75,127                 |
| N (total unique persons)            | 15,252                 | 10,149             | 5,103                  |

\*Covariates that are statistically significant at the 5% level

Appendix Table 4 shows the fixed effects regression results for the combined sample, The ACCORD only sample, and the ACCORD only sample with additional complications included in the fixed effects model. The additional complications available in the ACCORD dataset were neuropathy, severe vision loss, foot ulcer, and hypoglycemia requiring medical assistance. Most variables included in both models were the same or changed modestly when including the additional complications. Differences in health utility decrements for amputation are likely due to the inclusion of additional complications that are also correlated with amputation like foot ulcer events, history of foot ulcer – both of which had statistically significant health utility decrements.

**Appendix Table 4. Health Utility Decrements for Complications of Diabetes: Analyzing additional complications available in the ACCORD Study data.**

| <b>Covariate</b>                 | <b>Combined Sample</b> | <b>ACCORD Only</b> | <b>ACCORD Only: Additional Complications</b> |
|----------------------------------|------------------------|--------------------|----------------------------------------------|
| <b>Complication Coefficients</b> |                        |                    |                                              |
| Smoker                           | -0.006                 | -0.010             | -0.010                                       |

| <b>Covariate</b>                                | <b>Combined Sample</b> | <b>ACCORD Only</b> | <b>ACCORD Only: Additional Complications</b> |
|-------------------------------------------------|------------------------|--------------------|----------------------------------------------|
| BMI (one-unit increase)                         | -0.003*                | -0.002*            | -0.002*                                      |
| Duration of Diabetes (time-varying)             | -0.008*                | -0.007*            | -0.006*                                      |
| Stroke Event                                    | -0.109*                | -0.108*            | -0.108*                                      |
| History of Stroke                               | -0.051*                | -0.060*            | -0.060*                                      |
| Amputation Event                                | -0.092*                | -0.090*            | -0.001                                       |
| History of Amputation                           | -0.150*                | -0.147*            | -0.137*                                      |
| Dialysis Event                                  | -0.039*                | -0.016             | -0.016                                       |
| History of Dialysis                             | -0.015                 | -0.012             | -0.012                                       |
| MI Event                                        | -0.028*                | -0.018             | -0.018                                       |
| History of MI                                   | -0.006                 | 0.004              | 0.005                                        |
| CHF Event                                       | -0.051*                | -0.047*            | -0.048*                                      |
| History of CHF                                  | -0.041*                | -0.026             | -0.026                                       |
| Angina Event                                    | -0.015                 | 0.003              | 0.003                                        |
| History of Angina                               | -0.028*                | -0.009             | -0.008                                       |
| eGFR < 30 mL/min/1.73 m <sup>2</sup> Event      | -0.043*                | -0.066*            | -0.066*                                      |
| History of eGFR < 30 mL/min/1.73 m <sup>2</sup> | -0.025*                | -0.052*            | -0.052*                                      |
| eGFR < 60 mL/min/1.73 m <sup>2</sup> Event      | -0.014*                | -0.012*            | -0.012*                                      |
| History of eGFR < 60 mL/min/1.73 m <sup>2</sup> | -0.015*                | -0.016*            | -0.015*                                      |
| Revascularization Event                         | -0.005                 | -0.011             | -0.010                                       |
| History of Revascularization                    | -0.001                 | -0.019*            | -0.019*                                      |
| Laser Photocoagulation Event                    | -0.011                 | -0.013             | -0.010                                       |
| History of Laser Photocoagulation               | -0.014*                | -0.010             | -0.006                                       |
| Hypoglycemia (any assistance)                   | -0.001                 | 0.001              | 0.001                                        |
| Hypoglycemia (Medical assistance)               |                        |                    | <0.001                                       |

| <b>Covariate</b>                       | <b>Combined<br/>Sample</b> | <b>ACCORD Only</b> | <b>ACCORD Only:<br/>Additional<br/>Complications</b> |
|----------------------------------------|----------------------------|--------------------|------------------------------------------------------|
| Foot Ulcer Event                       |                            |                    | -0.017*                                              |
| History of Foot Ulcer                  |                            |                    | -0.022*                                              |
| Severe Vision Loss Event               |                            |                    | -0.045*                                              |
| History of Severe Vision<br>Loss       |                            |                    | -0.023*                                              |
| Neuropathy Event                       |                            |                    | -0.007*                                              |
| History of Neuropathy                  |                            |                    | -0.007                                               |
| Constant                               | 0.935*                     | 0.870*             | 0.870*                                               |
| <b>Estimation Sample</b>               |                            |                    |                                                      |
| N (total person-visit<br>observations) | 128,873                    | 53,746             | 53,746                                               |
| N (total unique persons)               | 15,252                     | 10,149             | 10,149                                               |

\*Covariates that are statistically significant at the 5% level
